# Supplementary material
Source: Springer Nature journal article supplement (https://www.springermedizin.de/resource/supplementary/13002_2012_307_MOESM5_ESM.pdf/9627764)

# Use vs. Chorology

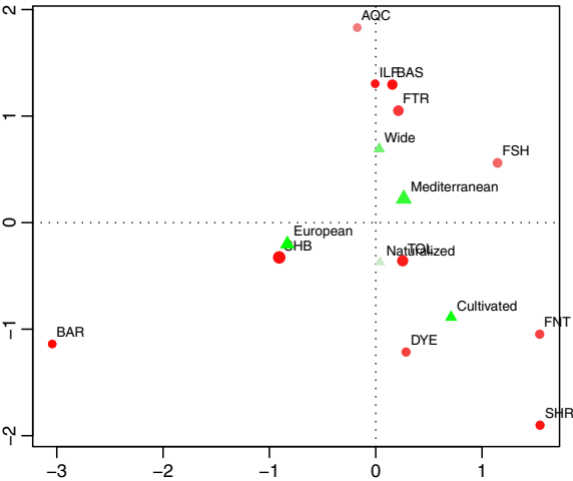

Supplement: MOESM5 [file 9627764]
